# Supplementary material for: Discovery of Genetic Variants of the Kinases That Activate Tenofovir in a Compartment-specific Manner
Source: PubMed Central journal article supplement — eBioMedicine. 2015 Jul 9;2(9):1145–52. doi: 10.1016/j.ebiom.2015.07.008 (PMC4588390; doi:10.1016/j.ebiom.2015.07.008), 2015-07-09
Supplement: mmc1.pdf [file mmc1.pdf]

## Supplementary Methods

### Targeting of nucleotide kinases using siRNA

Nucleotide kinases were knocked down using siGENOME siRNA (Dharmacon, GE Healthcare Life Sciences, Lafayette, CO). PBMC and tissues transfected with non-targeting siRNA were used as controls. For transfection of PBMC, a Neon™ Transfection System (Life Technologies, Frederick, MD) was used. Electroporation conditions were as follows: pulse voltage 2100 V, pulse width 15 ms, 1 pulse,  $1 \times 10^6$  cells, and 500 nM siRNA. For tissue electroporation, a total of 5 mg of tissue was used for a single electroporation. The tissues were electroporated in 0.4 cm cuvettes (Bio-Rad, Hercules, CA) using a Gene Pulser Xcell™ electroporator (Bio-Rad). A square waveform (500 V and 10 ms) and 500 nM of siRNA was used.

### Immunoblotting of nucleotide kinases

Following electroporation, tissues were cultured for 24 h and PBMC for 48 h in DMEM supplemented with 10% FBS prior to homogenization. For immunoblots, 10 µg of homogenized cells and tissues were resolved by SDS-PAGE gel electrophoresis. Proteins were transferred onto a nitrocellulose membrane and blotted with AK2, CKM, PKM, PKLR, and GUK1 antibodies (Thermo Fisher Scientific, Waltham, MA). Anti-β-actin was used for normalization (Cell Signaling, Danvers, MA).

### Detection of TFV, TFV-MP, and TFV-DP using ultra-high performance liquid chromatography-tandem mass spectrometry

TFV (10 µM; NIH AIDS Reagent Program) was added to the culture medium 24 h (for vaginal and colorectal tissues) or 48 h (for PBMC) after electroporation with siRNA. Following 12 h of incubation with TFV, the tissues and cells were harvested and homogenized in 70% methanol. Samples were centrifuged for 10 min at  $1,500 \times g$  at 4°C and the supernatant was dried under vacuum. An ultra-high performance liquid chromatography-tandem mass spectrometry (uHPLC-MS/MS) assay was developed for the quantification of TFV, TFV-MP, and TFV-DP using a Dionex Ultimate 3000 uHPLC system coupled to a TSQ Vantage Triple Stage Quadrupole mass spectrometer (Thermo Fisher Scientific). Analytes were separated using a Hypersil GOLD-C18 column (3 µm, 100 mm x 1 mm, Thermo Fisher Scientific) at a flow rate of 0.05 mL/min. Solvent A was 2 mM ammonium phosphate (Thermo Fisher Scientific) with 3 mM hexylamine (Thermo Fisher Scientific) in water, pH 9.2, and solvent B was acetonitrile (Thermo Fisher Scientific). The gradient used is as follows: 9% B from 0 to 0.5 min, 9% B to 60% B from 0.5 to 15.5 min, 60% B to 9% B from 15.5 to 15.6 min, and held at 9% B until 29.6 min. In selected reaction monitoring mode, fragment ions were detected by positive ionization using the following transitions (Q1 → Q3): TFV ( $m/z$  288 → 176), TFV-MP ( $m/z$  368 → 270), and TFV-DP ( $m/z$  448 → 270). Dried cell and tissue extracts were reconstituted in 100 µL mobile phase A for uHPLC-MS/MS analysis.

### Sample preparation for Next-generation sequencing

Samples were prepared following the TSCA library preparation guide using 50 ng of template DNA per reaction. Agencourt AMPure XP beads (Beckman Coulter, Inc., Brea, CA) were used for PCR clean-up and library normalization was performed according to the TSCA protocol. The final pooled DNA library (6 µL) was diluted in 594 µL HT1 buffer and spiked with 1% PhiX. One technical control was included per sample batch and runs were sequenced using an Illumina MiSeq sequencing platform generating 150 bp paired-end reads.

### Next-generation sequencing data analysis

Secondary analysis of the base calls and Phred-like quality score (Qscore) generated by Real Time Analysis software was performed using on-instrument MiSeq Reporter software. Reads were mapped to the GRCh37 (hg19) reference assembly using a banded Smith-Waterman algorithm and variant calling was carried out using the Genome Analysis Toolkit. Variant call format files were annotated using Illumina VariantStudio software. Raw variant calls were filtered applying a coverage threshold > 30X, a minimum base call Qscore of 30, and an alternate variant frequency > 20%. Variants were cross-referenced with the National Center for Biotechnology Information database of Single Nucleotide Polymorphisms. The phenotypic consequence of missense variants was assigned using SIFT (sorts intolerant from tolerant substitutions; J. Craig Venter Institute online tool) and PolyPhen (polymorphism phenotyping; Harvard University online tool) in silico prediction tools where amino acid substitutions were scored.<sup>1</sup>  
<sup>2</sup> A SIFT score < 0.05 was suggestive of a damaging amino acid substitution and > 0.05 a tolerated substitution, whereas a PolyPhen score > 0.908 was suggestive of a probably damaging, 0.447-0.908 a possibly damaging, or < 0.447 a benign amino acid substitution.

## References

1. Ng PC, Henikoff S. Predicting deleterious amino acid substitutions. *Genome Res.* 2001; **11**(5): 863-74.
2. Ramensky V, Bork P, Sunyaev S. Human non-synonymous SNPs: server and survey. *Nucleic Acids Res.* 2002; **30**(17): 3894-900.

Supplementary Table 1

| Target             | Chr | Start Coordinate | Stop Coordinate | Length | Padding Per Exon | Amplicons | Avoid SNPs | SNP Count | Coverage | Score | Added    | Labels |
|--------------------|-----|------------------|-----------------|--------|------------------|-----------|------------|-----------|----------|-------|----------|--------|
| AK2_Exon_2123580   | 1   | 33480113         | 33480205        | 93     | 10               | 1         | Yes        | 2         | 100      | 96    | 6/4/2014 |        |
| AK2_Exon_2123827   | 1   | 33473531         | 33476444        | 2914   | 10               | 21        | Yes        | 30        | 100      | 79    | 6/4/2014 |        |
| AK2_Exon_2124084   | 1   | 33490033         | 33490178        | 146    | 10               | 1         | Yes        | 0         | 100      | 96    | 6/4/2014 |        |
| AK2_Exon_2126005   | 1   | 33502327         | 33502522        | 196    | 10               | 2         | Yes        | 0         | 100      | 60    | 6/4/2014 |        |
| AK2_Exon_2297408   | 1   | 33497135         | 33497272        | 138    | 10               | 1         | Yes        | 0         | 100      | 96    | 6/4/2014 |        |
| AK2 + AK2          | 1   | 33476816         | 33479013        | 2198   | 0                | 13        | Yes        | 8         | 79       | 90    | 6/4/2014 | Merged |
| AK2 + AK2 + AK2    | 1   | 33486958         | 33487314        | 357    | 0                | 3         | Yes        | 6         | 100      | 66    | 6/4/2014 | Merged |
| PKM2 + PKM2        | 15  | 72499059         | 72499628        | 570    | 0                | 5         | Yes        | 4         | 100      | 79    | 6/4/2014 | Merged |
| PKM2 + PKM2        | 15  | 72523231         | 72523694        | 464    | 0                | 4         | Yes        | 10        | 100      | 60    | 6/4/2014 | Merged |
| pkfr + pkfr        | 1   | 155262958        | 155263391       | 434    | 0                | 4         | Yes        | 2         | 100      | 70    | 6/4/2014 | Merged |
| pkfr + pkfr        | 1   | 155270662        | 155271235       | 574    | 0                | 5         | Yes        | 0         | 100      | 75    | 6/4/2014 | Merged |
| pkfr + pkfr        | 1   | 155264016        | 155264553       | 538    | 0                | 3         | Yes        | 0         | 89       | 66    | 6/4/2014 | Merged |
| pkfr + pkfr + pkfr | 1   | 155264897        | 155265557       | 661    | 0                | 5         | Yes        | 0         | 100      | 64    | 6/4/2014 | Merged |
| PKM2_Exon_2133147  | 15  | 72502004         | 72502210        | 207    | 10               | 2         | Yes        | 0         | 100      | 96    | 6/4/2014 |        |
| PKM2_Exon_2133145  | 15  | 72491360         | 72492107        | 748    | 10               | 6         | Yes        | 10        | 100      | 69    | 6/4/2014 |        |
| PKM2_Exon_2132671  | 15  | 72502678         | 72502829        | 152    | 10               | 1         | Yes        | 0         | 100      | 80    | 6/4/2014 |        |
| PKM2_Exon_2130832  | 15  | 72509740         | 72509851        | 112    | 10               | 1         | Yes        | 2         | 100      | 95    | 6/4/2014 |        |
| PKM2_Exon_2130918  | 15  | 72511275         | 72511461        | 187    | 10               | 1         | Yes        | 0         | 100      | 96    | 6/4/2014 |        |
| PKM2_Exon_2129898  | 15  | 72494785         | 72494971        | 187    | 10               | 1         | Yes        | 0         | 100      | 80    | 6/4/2014 |        |
| PKM2_Exon_2130917  | 15  | 72492805         | 72493006        | 202    | 10               | 2         | Yes        | 6         | 100      | 60    | 6/4/2014 |        |
| PKM2_Exon_2132670  | 15  | 72500952         | 72501242        | 291    | 10               | 3         | Yes        | 4         | 100      | 85    | 6/4/2014 |        |
| PKM2_Exon_2256281  | 15  | 72495353         | 72495539        | 187    | 10               | 2         | Yes        | 0         | 100      | 60    | 6/4/2014 |        |
| PKLR_Exon_2008276  | 1   | 155259074        | 155260479       | 1406   | 10               | 0         | Yes        | 0         | 0        | 0     | 6/4/2014 |        |
| PKLR_Exon_2010448  | 1   | 155261537        | 155261738       | 202    | 10               | 1         | Yes        | 0         | 100      | 96    | 6/4/2014 |        |
| PKLR_Exon_2008350  | 1   | 155269879        | 155270081       | 203    | 10               | 1         | Yes        | 0         | 100      | 60    | 6/4/2014 |        |
| CKM_Exon_2256677   | 19  | 45809661         | 45810196        | 536    | 10               | 4         | Yes        | 8         | 100      | 74    | 6/4/2014 |        |
| CKM_Exon_2256845   | 19  | 45814997         | 45815188        | 192    | 10               | 2         | Yes        | 2         | 100      | 70    | 6/4/2014 |        |
| CKM_Exon_2258427   | 19  | 45811657         | 45811800        | 144    | 10               | 1         | Yes        | 0         | 100      | 80    | 6/4/2014 |        |
| CKM_Exon_2257753   | 19  | 45826069         | 45826243        | 175    | 10               | 1         | Yes        | 0         | 100      | 60    | 6/4/2014 |        |
| CKM_Exon_2256678   | 19  | 45818713         | 45818865        | 153    | 10               | 1         | Yes        | 0         | 100      | 60    | 6/4/2014 |        |
| CKM_Exon_2256846   | 19  | 45822769         | 45822999        | 231    | 10               | 1         | Yes        | 0         | 47       | 96    | 6/4/2014 |        |
| CKM_Exon_2258262   | 19  | 45810709         | 45810918        | 210    | 10               | 2         | Yes        | 0         | 100      | 70    | 6/4/2014 |        |
| CKM_Exon_2259371   | 19  | 45821073         | 45821247        | 175    | 10               | 1         | Yes        | 0         | 100      | 60    | 6/4/2014 |        |

Supplementary Table 2

| Amplicon            | Chr | Start Coordinate | Stop Coordinate | Target        | Length | Strand  | Avoid SNPs | SNP Count | Score |
|---------------------|-----|------------------|-----------------|---------------|--------|---------|------------|-----------|-------|
| Amplicon (45486902) | 19  | 45818686         | 45818958        | Exon_2256678  | 272    | REVERSE | Yes        | 0         | 60    |
| Amplicon (45486904) | 19  | 45810584         | 45810821        | Exon_2258262  | 238    | REVERSE | Yes        | 0         | 80    |
| Amplicon (45486905) | 19  | 45810768         | 45810992        | Exon_2258262  | 225    | FORWARD | Yes        | 0         | 80    |
| Amplicon (45486903) | 19  | 45822644         | 45822903        | Exon_2256846  | 260    | FORWARD | Yes        | 0         | 96    |
| Amplicon (45486923) | 15  | 72498932         | 72499156        | UserDefined_0 | 225    | REVERSE | Yes        | 2         | 60    |
| Amplicon (45486924) | 15  | 72499072         | 72499297        | UserDefined_0 | 226    | FORWARD | Yes        | 0         | 80    |
| Amplicon (45486925) | 15  | 72499214         | 72499439        | UserDefined_0 | 226    | REVERSE | Yes        | 0         | 80    |
| Amplicon (45486926) | 15  | 72499358         | 72499587        | UserDefined_0 | 230    | FORWARD | Yes        | 2         | 80    |
| Amplicon (45486927) | 15  | 72499538         | 72499763        | UserDefined_0 | 226    | REVERSE | Yes        | 0         | 96    |
| Amplicon (45486928) | 15  | 72523108         | 72523334        | UserDefined_0 | 227    | REVERSE | Yes        | 2         | 60    |
| Amplicon (45486929) | 15  | 72523258         | 72523503        | UserDefined_0 | 246    | FORWARD | Yes        | 0         | 60    |
| Amplicon (45486930) | 15  | 72523448         | 72523721        | UserDefined_0 | 274    | REVERSE | Yes        | 0         | 60    |
| Amplicon (45486931) | 15  | 72523668         | 72523897        | UserDefined_0 | 230    | FORWARD | Yes        | 8         | 60    |
| Amplicon (45486906) | 19  | 45821042         | 45821281        | Exon_2259971  | 240    | REVERSE | Yes        | 0         | 60    |
| Amplicon (45486989) | 15  | 72500827         | 72501053        | Exon_2132670  | 227    | REVERSE | Yes        | 0         | 96    |
| Amplicon (45486990) | 15  | 72500973         | 72501242        | Exon_2132670  | 270    | FORWARD | Yes        | 0         | 80    |
| Amplicon (45486991) | 15  | 72501189         | 72501415        | Exon_2132670  | 227    | REVERSE | Yes        | 4         | 80    |
| Amplicon (45486992) | 15  | 72495230         | 72495454        | Exon_2256281  | 225    | FORWARD | Yes        | 0         | 60    |
| Amplicon (45486993) | 15  | 72495408         | 72495634        | Exon_2256281  | 227    | REVERSE | Yes        | 0         | 60    |
| Amplicon (45486987) | 15  | 72492678         | 72492910        | Exon_2130917  | 233    | REVERSE | Yes        | 2         | 60    |
| Amplicon (45486988) | 15  | 72492862         | 72493088        | Exon_2130917  | 227    | FORWARD | Yes        | 4         | 60    |
| Amplicon (45486907) | 1   | 33476691         | 33476916        | UserDefined_0 | 226    | FORWARD | Yes        | 0         | 96    |
| Amplicon (45486908) | 1   | 33476831         | 33477057        | UserDefined_0 | 227    | REVERSE | Yes        | 0         | 80    |
| Amplicon (45486909) | 1   | 33476979         | 33477207        | UserDefined_0 | 229    | FORWARD | Yes        | 0         | 96    |
| Amplicon (45486910) | 1   | 33477123         | 33477348        | UserDefined_0 | 226    | REVERSE | Yes        | 0         | 96    |
| Amplicon (45486911) | 1   | 33477265         | 33477490        | UserDefined_0 | 226    | FORWARD | Yes        | 0         | 60    |
| Amplicon (45486912) | 1   | 33477403         | 33477627        | UserDefined_0 | 225    | REVERSE | Yes        | 0         | 98    |
| Amplicon (45486913) | 1   | 33477541         | 33477766        | UserDefined_0 | 226    | FORWARD | Yes        | 0         | 95    |
| Amplicon (45486914) | 1   | 33477679         | 33477907        | UserDefined_0 | 229    | REVERSE | Yes        | 0         | 98    |
| Amplicon (45486915) | 1   | 33477823         | 33478048        | UserDefined_0 | 226    | FORWARD | Yes        | 0         | 96    |
| Amplicon (45486916) | 1   | 33477967         | 33478213        | UserDefined_0 | 247    | REVERSE | Yes        | 0         | 98    |
| Amplicon (45486917) | 1   | 33478615         | 33478839        | UserDefined_0 | 225    | REVERSE | Yes        | 4         | 98    |
| Amplicon (45486918) | 1   | 33478757         | 33478996        | UserDefined_0 | 240    | FORWARD | Yes        | 2         | 80    |
| Amplicon (45486919) | 1   | 33478945         | 33479171        | UserDefined_0 | 227    | REVERSE | Yes        | 2         | 80    |
| Amplicon (45486944) | 1   | 155264768        | 155264993       | UserDefined_0 | 226    | REVERSE | Yes        | 0         | 60    |
| Amplicon (45486945) | 1   | 155264916        | 155265143       | UserDefined_0 | 228    | FORWARD | Yes        | 0         | 60    |
| Amplicon (45486946) | 1   | 155265068        | 155265293       | UserDefined_0 | 226    | REVERSE | Yes        | 0         | 60    |
| Amplicon (45486947) | 1   | 155265212        | 155265439       | UserDefined_0 | 228    | FORWARD | Yes        | 0         | 60    |
| Amplicon (45486948) | 1   | 155265392        | 155265617       | UserDefined_0 | 226    | REVERSE | Yes        | 0         | 80    |
| Amplicon (45486941) | 1   | 155264049        | 155264277       | UserDefined_0 | 229    | REVERSE | Yes        | 0         | 60    |
| Amplicon (45486942) | 1   | 155264193        | 155264428       | UserDefined_0 | 236    | FORWARD | Yes        | 0         | 60    |
| Amplicon (45486943) | 1   | 155264375        | 155264599       | UserDefined_0 | 225    | REVERSE | Yes        | 0         | 80    |
| Amplicon (45486932) | 1   | 155262831        | 155263057       | UserDefined_0 | 227    | REVERSE | Yes        | 0         | 80    |
| Amplicon (45486933) | 1   | 155262977        | 155263206       | UserDefined_0 | 230    | FORWARD | Yes        | 2         | 60    |
| Amplicon (45486934) | 1   | 155263123        | 155263349       | UserDefined_0 | 227    | REVERSE | Yes        | 0         | 60    |
| Amplicon (45486935) | 1   | 155263295        | 155263520       | UserDefined_0 | 226    | FORWARD | Yes        | 0         | 80    |
| Amplicon (45486936) | 1   | 155270537        | 155270771       | UserDefined_0 | 235    | FORWARD | Yes        | 0         | 60    |
| Amplicon (45486937) | 1   | 155270693        | 155270918       | UserDefined_0 | 226    | REVERSE | Yes        | 0         | 80    |
| Amplicon (45486938) | 1   | 155270843        | 155271067       | UserDefined_0 | 225    | FORWARD | Yes        | 0         | 80    |
| Amplicon (45486939) | 1   | 155270981        | 155271206       | UserDefined_0 | 226    | REVERSE | Yes        | 0         | 60    |
| Amplicon (45486940) | 1   | 155271157        | 155271417       | UserDefined_0 | 261    | FORWARD | Yes        | 0         | 96    |
| Amplicon (45486920) | 1   | 33486831         | 33487061        | UserDefined_0 | 231    | REVERSE | Yes        | 2         | 60    |
| Amplicon (45486921) | 1   | 33486989         | 33487214        | UserDefined_0 | 226    | FORWARD | Yes        | 2         | 60    |
| Amplicon (45486922) | 1   | 33487163         | 33487388        | UserDefined_0 | 226    | REVERSE | Yes        | 2         | 80    |
| Amplicon (45486972) | 1   | 33502204         | 33502431        | Exon_2126005  | 228    | REVERSE | Yes        | 0         | 60    |
| Amplicon (45486973) | 1   | 33502378         | 33502603        | Exon_2126005  | 226    | FORWARD | Yes        | 0         | 60    |
| Amplicon (45486950) | 1   | 33473404         | 33473668        | Exon_2123827  | 265    | REVERSE | Yes        | 0         | 98    |
| Amplicon (45486951) | 1   | 33473582         | 33473808        | Exon_2123827  | 227    | FORWARD | Yes        | 0         | 60    |
| Amplicon (45486952) | 1   | 33473724         | 33473948        | Exon_2123827  | 225    | REVERSE | Yes        | 0         | 80    |
| Amplicon (45486953) | 1   | 33473868         | 33474092        | Exon_2123827  | 225    | FORWARD | Yes        | 0         | 96    |
| Amplicon (45486954) | 1   | 33474010         | 33474238        | Exon_2123827  | 229    | REVERSE | Yes        | 0         | 80    |
| Amplicon (45486955) | 1   | 33474154         | 33474378        | Exon_2123827  | 225    | FORWARD | Yes        | 0         | 96    |
| Amplicon (45486956) | 1   | 33474300         | 33474524        | Exon_2123827  | 225    | REVERSE | Yes        | 0         | 80    |
| Amplicon (45486957) | 1   | 33474444         | 33474668        | Exon_2123827  | 225    | FORWARD | Yes        | 0         | 96    |
| Amplicon (45486958) | 1   | 33474582         | 33474809        | Exon_2123827  | 229    | REVERSE | Yes        | 0         | 60    |
| Amplicon (45486959) | 1   | 33474726         | 33474953        | Exon_2123827  | 228    | FORWARD | Yes        | 0         | 80    |
| Amplicon (45486960) | 1   | 33474868         | 33475092        | Exon_2123827  | 225    | REVERSE | Yes        | 0         | 98    |
| Amplicon (45486961) | 1   | 33475012         | 33475237        | Exon_2123827  | 226    | FORWARD | Yes        | 2         | 98    |
| Amplicon (45486962) | 1   | 33475152         | 33475382        | Exon_2123827  | 231    | REVERSE | Yes        | 0         | 60    |
| Amplicon (45486963) | 1   | 33475298         | 33475524        | Exon_2123827  | 227    | FORWARD | Yes        | 0         | 80    |
| Amplicon (45486964) | 1   | 33475446         | 33475671        | Exon_2123827  | 226    | REVERSE | Yes        | 2         | 95    |
| Amplicon (45486965) | 1   | 33475586         | 33475811        | Exon_2123827  | 226    | FORWARD | Yes        | 4         | 60    |
| Amplicon (45486966) | 1   | 33475726         | 33475950        | Exon_2123827  | 225    | REVERSE | Yes        | 2         | 80    |
| Amplicon (45486967) | 1   | 33475876         | 33476100        | Exon_2123827  | 225    | FORWARD | Yes        | 6         | 80    |
| Amplicon (45486968) | 1   | 33476018         | 33476243        | Exon_2123827  | 226    | REVERSE | Yes        | 8         | 60    |
| Amplicon (45486969) | 1   | 33476154         | 33476402        | Exon_2123827  | 249    | FORWARD | Yes        | 4         | 60    |
| Amplicon (45486970) | 1   | 33476352         | 33476577        | Exon_2123827  | 226    | REVERSE | Yes        | 2         | 80    |
| Amplicon (45486971) | 1   | 33490004         | 33490274        | Exon_2124084  | 271    | REVERSE | Yes        | 0         | 96    |
| Amplicon (45486994) | 1   | 155261502        | 155261768       | Exon_2010448  | 267    | REVERSE | Yes        | 0         | 96    |
| Amplicon (45486949) | 1   | 33480078         | 33480338        | Exon_2121580  | 261    | REVERSE | Yes        | 2         | 96    |
| Amplicon (45486900) | 19  | 45811626         | 45811869        | Exon_2258427  | 244    | REVERSE | Yes        | 0         | 80    |
| Amplicon (45486901) | 19  | 45826034         | 45826287        | Exon_2257753  | 254    | REVERSE | Yes        | 0         | 60    |
| Amplicon (45486974) | 1   | 33497104         | 33497342        | Exon_2297408  | 239    | REVERSE | Yes        | 0         | 96    |
| Amplicon (45486894) | 19  | 45809534         | 45809758        | Exon_2256677  | 225    | REVERSE | Yes        | 2         | 80    |
| Amplicon (45486895) | 19  | 45809676         | 45809900        | Exon_2256677  | 225    | FORWARD | Yes        | 4         | 60    |
| Amplicon (45486896) | 19  | 45809822         | 45810070        | Exon_2256677  | 249    | REVERSE | Yes        | 0         | 96    |
| Amplicon (45486897) | 19  | 45810018         | 45810243        | Exon_2256677  | 226    | FORWARD | Yes        | 2         | 60    |
| Amplicon (45486898) | 19  | 45814870         | 45815100        | Exon_2256845  | 231    | REVERSE | Yes        | 0         | 80    |
| Amplicon (45486899) | 19  | 45815048         | 45815274        | Exon_2256845  | 227    | FORWARD | Yes        | 2         | 60    |
| Amplicon (45486995) | 1   | 155369852        | 155370123       | Exon_2008350  | 272    | REVERSE | Yes        | 0         | 60    |
| Amplicon (45486975) | 15  | 72501875         | 72502100        | Exon_2133147  | 226    | REVERSE | Yes        | 0         | 96    |
| Amplicon (45486976) | 15  | 72502047         | 72502273        | Exon_2133147  | 227    | FORWARD | Yes        | 0         | 96    |
| Amplicon (45486977) | 15  | 72491237         | 72491461        | Exon_2133145  | 225    | REVERSE | Yes        | 0         | 60    |
| Amplicon (45486978) | 15  | 72491381         | 72491605        | Exon_2133145  | 225    | FORWARD | Yes        | 0         | 96    |
| Amplicon (45486979) | 15  | 72491523         | 72491751        | Exon_2133145  | 229    | REVERSE | Yes        | 6         | 60    |
| Amplicon (45486980) | 15  | 72491667         | 72491896        | Exon_2133145  | 230    | FORWARD | Yes        | 4         | 60    |
| Amplicon (45486981) | 15  | 72491815         | 72492045        | Exon_2133145  | 231    | REVERSE | Yes        | 0         | 80    |
| Amplicon (45486982) | 15  | 72491999         | 72492224        | Exon_2133145  | 226    | FORWARD | Yes        | 0         | 60    |
| Amplicon (45486985) | 15  | 72511234         | 72511496        | Exon_2130918  | 263    | REVERSE | Yes        | 0         | 96    |
| Amplicon (45486984) | 15  | 72509717         | 72509967        | Exon_2130832  | 251    | REVERSE | Yes        | 2         | 95    |
| Amplicon (45486986) | 15  | 72494760         | 72495030        | Exon_2129898  | 271    | REVERSE | Yes        | 0         | 80    |
| Amplicon (45486983) | 15  | 72502647         | 72502877        | Exon_2132671  | 231    | REVERSE | Yes        | 0         | 80    |

Supplementary Table 3

| Study Site | Ethnicity         | Gene | Consequence           | Variant (Ref>Alt) | Chr | Coordinate | Genotype | Read Depth | Quality | Alt. Variant Frequency | cDNA Position | Coding DNA Sequence Position | Protein Position | Amino Acid (Ref>Alt) | Exon | Intron | SIFT Prediction    | PolyPhen Prediction       |
|------------|-------------------|------|-----------------------|-------------------|-----|------------|----------|------------|---------|------------------------|---------------|------------------------------|------------------|----------------------|------|--------|--------------------|---------------------------|
| USA        | Multiracial       | AK2  | Splice Region Variant | C>T               | 1   | 3350237    | Het      | 81         | 377.81  | 28.6                   | 176           | 93                           | 31               | Q                    | 1/6  |        |                    |                           |
| USA        | African American  | AK2  | Missense Variant      | A>G               | 1   | 3349006    | Het      | 114        | 100     | 21.93                  | 249           | 166                          | 56               | S>P                  | 2/6  |        | Deleterious (0.02) | Probably Damaging (0.95)  |
| UGA        | African           | AK2  | Deletion              | AC>A              | 1   | 33490041   | Het      | 100        | 93      | 20.43                  | 0             | 0                            | 0                |                      | 2/5  |        |                    |                           |
| USA        | African American  | AK2  | Stop Gained           | T>A               | 1   | 33487271   | Het      | 209        | 100     | 44.98                  | 336           | 253                          | 85               | K>*                  | 3/6  |        |                    |                           |
| SA         | African           | AK2  | Splice Region Variant | C>G               | 1   | 33487190   | Het      | 43         | 292.96  | 25.6                   | 0             | 0                            | 0                |                      | 3/5  |        |                    |                           |
| USA        | European American | AK2  | Missense Variant      | T>C               | 1   | 33487025   | Het      | 44         | 411.37  | 31.8                   | 451           | 368                          | 123              | D>G                  | 4/6  |        | Deleterious (0)    | Possibly Damaging (0.452) |
| USA        | African American  | AK2  | Splice Region Variant | G>A               | 1   | 33480194   | Het      | 35         | 95.01   | 22.9                   | 510           | 427                          | 143              | L                    | 5/6  |        |                    |                           |
| SA         | African           | AK2  | Missense Variant      | A>G               | 1   | 33480193   | Het      | 146        | 411.68  | 22.1                   | 511           | 428                          | 143              | L>P                  | 5/6  |        | Deleterious (0)    | Probably Damaging (1)     |
| SA         | African           | AK2  | Missense Variant      | G>A               | 1   | 33480188   | Het      | 83         | 618.48  | 27.7                   | 516           | 433                          | 145              | H>Y                  | 5/6  |        | Deleterious (0)    | Probably Damaging (1)     |
| USA        | African American  | AK2  | Missense Variant      | A>G               | 1   | 33479002   | Het      | 34         | 472.36  | 44.1                   | 583           | 500                          | 167              | E>T                  | 6/6  |        | Deleterious (0.03) | Possibly Damaging (0.632) |
| UGA        | African           | AK2  | Missense Variant      | T>A               | 1   | 33478963   | Het      | 56         | 100     | 32.14                  | 622           | 539                          | 180              | E>V                  | 6/6  |        | Tolerated (0.27)   | Benign (0.009)            |
| UGA        | African           | AK2  | Missense Variant      | G>T               | 1   | 33478842   | Het      | 61         | 100     | 26.23                  | 743           | 660                          | 220              | F>L                  | 6/6  |        | Tolerated (0.08)   | Benign (0.079)            |

Supplementary Table 4

| Study Site | Ethnicity         | Gene | Consequence      | Ref. SNP   | Variant (Ref->Alt) | Chr | Coordinate | Genotype | Read Depth | Quality  | Alt. Variant Frequency | cDNA Position | Coding DNA Sequence Position | Protein Position | Amino Acid (Ref->Alt) | Exon | SIFT Prediction    | PolyPhen Prediction       |
|------------|-------------------|------|------------------|------------|--------------------|-----|------------|----------|------------|----------|------------------------|---------------|------------------------------|------------------|-----------------------|------|--------------------|---------------------------|
| SA         | Multiracial       | CKM  | Stop Gained      |            | T>A                | 19  | 45822839   | Het      | 33         | 195.69   | 24.2                   | 308           | 133                          | 45               | K->                   | 2:8  |                    |                           |
| USA        | European American | CKM  | Missense Variant |            | A>G                | 19  | 45821187   | Het      | 111        | 1172.15  | 54.1                   | 419           | 244                          | 82               | Y>H                   | 3:8  | Deleterious (0.02) | Possibly Damaging (0.474) |
| USA        | European American | CKM  | Missense Variant | rs11559024 | T>C                | 19  | 45821183   | Het      | 246        | 2698.31  | 55.7                   | 423           | 248                          | 83               | E>G                   | 3:8  | Deleterious (0.01) | Possibly Damaging (0.467) |
| USA        | African American  | CKM  | Missense Variant |            | T>C                | 19  | 45821171   | Het      | 40         | 178.01   | 30                     | 435           | 260                          | 87               | E>G                   | 3:8  | Deleterious (0.04) | Possibly Damaging (0.467) |
| SA         | African           | CKM  | Missense Variant |            | C>T                | 19  | 45821144   | Het      | 75         | 298.11   | 24.3                   | 462           | 287                          | 96               | R>H                   | 3:8  | Tolerated (0.07)   | Probably Damaging (0.976) |
| UGA        | African           | CKM  | Missense Variant |            | G>A                | 19  | 45821142   | Het      | 87         | 100      | 33.33                  | 464           | 289                          | 97               | H>Y                   | 3:8  | Deleterious (0)    | Probably Damaging (0.985) |
| UGA        | African           | CKM  | Missense Variant |            | C>T                | 19  | 45818815   | Het      | 69         | 100      | 36.23                  | 564           | 389                          | 130              | R>H                   | 4:8  | Deleterious (0)    | Probably Damaging (0.966) |
| UGA        | African           | CKM  | Deletion         |            | TC>T               | 19  | 45818725   | Het      | 87         | 100      | 29.89                  | 653           | 478                          | 160              |                       |      |                    |                           |
| USA        | European American | CKM  | Missense Variant | rs17357122 | G>A                | 19  | 45815163   | Het      | 1222       | 12543.15 | 52.3                   | 672           | 497                          | 166              | T>M                   | 5:8  | Deleterious (0.03) | Possibly Damaging (0.56)  |
| USA        | European American | CKM  | Missense Variant |            | C>T                | 19  | 45815161   | Het      | 135        | 453.95   | 21.5                   | 674           | 499                          | 167              | G>S                   | 5:8  | Deleterious (0.01) | Benign (0.207)            |
| SA         | African           | CKM  | Missense Variant |            | A>G                | 19  | 45815155   | Het      | 85         | 359.74   | 29.4                   | 680           | 505                          | 169              | F>L                   | 5:8  | Tolerated (1)      | Benign (0.003)            |
| USA        | African American  | CKM  | Missense Variant |            | A>G                | 19  | 45815143   | Het      | 74         | 306.33   | 27                     | 692           | 517                          | 173              | Y>H                   | 5:8  | Deleterious (0)    | Possibly Damaging (0.725) |
| USA        | Hispanic          | CKM  | Missense Variant |            | C>T                | 19  | 45815077   | Het      | 45         | 648.34   | 44.4                   | 758           | 583                          | 195              | D>N                   | 5:8  | Tolerated (0.06)   | Benign (0.099)            |
| UGA        | African           | CKM  | Missense Variant |            | G>C                | 19  | 45815056   | Het      | 64         | 100      | 51.56                  | 779           | 604                          | 202              | L>V                   | 5:8  | Deleterious (0.03) | Possibly Damaging (0.878) |
| SA         | African           | CKM  | Missense Variant | rs17875625 | C>A                | 19  | 45811716   | Het      | 149        | 1742.6   | 36.2                   | 903           | 728                          | 243              | G>V                   | 6:8  | Deleterious (0)    | Probably Damaging (0.949) |
| UGA        | African           | CKM  | Missense Variant |            | T>A                | 19  | 45810892   | Het      | 228        | 100      | 29.39                  | 969           | 794                          | 265              | K>M                   | 7:8  | Deleterious (0)    | Possibly Damaging (0.799) |
| USA        | African American  | CKM  | Missense Variant |            | T>C                | 19  | 45810880   | Het      | 73         | 203.8    | 23.6                   | 981           | 806                          | 269              | H>R                   | 7:8  | Tolerated (0.27)   | Benign (0.002)            |
| SA         | African           | CKM  | Stop Gained      |            | T>A                | 19  | 45810794   | Het      | 67         | 344.42   | 20.9                   | 1067          | 892                          | 298              | K>                    | 7:8  |                    |                           |
| SA         | African           | CKM  | Missense Variant |            | A>T                | 19  | 45810781   | Het      | 36         | 275.73   | 28.6                   | 1080          | 905                          | 302              | L>Q                   | 7:8  | Deleterious (0)    | Probably Damaging (0.919) |
| USA        | African American  | CKM  | Missense Variant |            | A>G                | 19  | 45810736   | Het      | 37         | 100      | 81.08                  | 1125          | 950                          | 317              | L>P                   | 7:8  | Deleterious (0)    | Probably Damaging (0.999) |
| USA        | European American | CKM  | Missense Variant |            | T>C                | 19  | 45810049   | Het      | 43         | 747.67   | 51.2                   | 1280          | 1105                         | 369              | K>E                   | 8:8  | Tolerated (0.1)    | Benign (0.001)            |

Supplementary Table 5

| Study Site | Ethnicity         | Gene | Consequence             | Ref. SNP    | Variant (Ref.>Alt.) | Chr | Coordinate | Genotype | Read Depth | Quality | Alt. Variant Frequency | cDNA Position | Coding DNA Sequence Position | Protein Position | Amino Acid (Ref.>Alt.) | Exon  | Intron |
|------------|-------------------|------|-------------------------|-------------|---------------------|-----|------------|----------|------------|---------|------------------------|---------------|------------------------------|------------------|------------------------|-------|--------|
| USA        | European American | PKM  | Stop Gained             | rs180716407 | G>C                 | 15  | 72523315   | Het      | 98         | 257.56  | 70.4                   | 413           | 14                           | 5                | S>*                    | 1/12  |        |
| USA        | African American  | PKM  | Missense Variant        |             | C>T                 | 15  | 72511417   | Het      | 69         | 1786.01 | 72.5                   | 643           | 244                          | 82               | A>T                    | 3/12  |        |
| USA        | Asian             | PKM  | Missense Variant        |             | G>C                 | 15  | 72511307   | Het      | 41         | 220.69  | 22.5                   | 753           | 354                          | 118              | N>K                    | 3/12  |        |
| SA         | African           | PKM  | Missense Variant        |             | T>A                 | 15  | 72511306   | Het      | 51         | 310.69  | 23.5                   | 754           | 355                          | 119              | T>S                    | 3/12  |        |
| USA        | African American  | PKM  | Splice Region Variant   |             | G>T                 | 15  | 72509849   | Het      | 53         | 229.65  | 28.3                   | 0             | 0                            | 0                |                        |       | 3/11   |
| USA        | European American | PKM  | Splice Region Variant   |             | G>T                 | 15  | 72509849   | Hom      | 68         | 1526.7  | 100                    | 0             | 0                            | 0                |                        |       | 3/11   |
| USA        | European American | PKM  | Missense Variant        | rs147929689 | C>A                 | 15  | 72509839   | Het      | 92         | 719.87  | 42.2                   | 788           | 389                          | 130              | R>L                    | 4/12  |        |
| USA        | European American | PKM  | Missense Variant        |             | A>T                 | 15  | 72502768   | Het      | 146        | 690.44  | 28.8                   | 919           | 520                          | 174              | S>T                    | 5/12  |        |
| USA        | African American  | PKM  | Deletion                |             | AT>A                | 15  | 72502154   | Het      | 116        | 795.61  | 25.9                   | 1045          | 646                          | 216              |                        | 6/12  |        |
| SA         | African           | PKM  | Missense Variant        |             | A>T                 | 15  | 72502148   | Het      | 71         | 387.61  | 31                     | 1052          | 653                          | 218              | L>Q                    | 6/12  |        |
| UGA        | African           | PKM  | Missense Variant        |             | T>C                 | 15  | 72502097   | Het      | 32         | 73      | 21.88                  | 1103          | 704                          | 235              | Y>C                    | 6/12  |        |
| SA         | African           | PKM  | Splice Region Variant   |             | C>T                 | 15  | 72502099   | Het      | 155        | 1609.82 | 58.6                   | 0             | 0                            | 0                |                        |       | 6/11   |
| UGA        | African           | PKM  | Missense Variant        |             | C>A                 | 15  | 72499595   | Het      | 104        | 100     | 29.81                  | 1483          | 1084                         | 362              | D>Y                    | 8/12  |        |
| USA        | Multiracial       | PKM  | Missense Variant        |             | T>C                 | 15  | 72499587   | Het      | 37         | 229.14  | 24.3                   | 1489          | 1090                         | 364              | L>V                    | 8/12  |        |
| UGA        | African           | PKM  | Missense Variant        |             | C>T                 | 15  | 72499476   | Het      | 98         | 100     | 46.94                  | 1600          | 1201                         | 401              | A>T                    | 8/12  |        |
| UGA        | African           | PKM  | Missense Variant        |             | T>C                 | 15  | 72499202   | Het      | 162        | 100     | 23.46                  | 1628          | 1229                         | 410              | K>R                    | 9/12  |        |
| USA        | African American  | PKM  | Missense Variant        |             | T>G                 | 15  | 72499188   | Het      | 43         | 309.72  | 42.9                   | 1642          | 1243                         | 415              | T>P                    | 9/12  |        |
| USA        | African American  | PKM  | Stop Gained             | rs151078084 | G>A                 | 15  | 72499077   | Het      | 53         | 656.2   | 60.4                   | 1753          | 1354                         | 452              | Q>*                    | 9/12  |        |
| SA         | African           | PKM  | Splice Donor Variant    |             | C>A                 | 15  | 72499068   | Het      | 35         | 130.68  | 28.6                   | 0             | 0                            | 0                |                        |       | 9/11   |
| USA        | European American | PKM  | Splice Acceptor Variant |             | T>A                 | 15  | 72495531   | Het      | 118        | 464.01  | 25.4                   | 0             | 0                            | 0                |                        |       | 9/11   |
| SA         | Asian             | PKM  | Missense Variant        |             | C>T                 | 15  | 72495471   | Het      | 192        | 1360.88 | 25                     | 1820          | 1421                         | 474              | R>Q                    | 10/12 |        |
| UGA        | African           | PKM  | Missense Variant        |             | C>T                 | 15  | 72495394   | Het      | 37         | 100     | 51.35                  | 1897          | 1498                         | 500              | A>T                    | 10/12 |        |
| USA        | European American | PKM  | Missense Variant        |             | T>C                 | 15  | 72492094   | Het      | 78         | 909.97  | 89                     | 2114          | 1715                         | 572              | K>R                    | 12/12 |        |

Supplementary Table 6

| Study Site | Ethnicity         | Gene | Consequence             | Ref. SNP    | Variant (Ref.>Alt.) | Chr | Coordinate | Genotype | Read Depth | Quality | Alt. Variant Frequency | cDNA Position | Coding DNA Sequence Position | Protein Position | Amino Acid (Ref.>Alt.) | Exon | Intron | SIFT Prediction    | PolyPhen Prediction       |
|------------|-------------------|------|-------------------------|-------------|---------------------|-----|------------|----------|------------|---------|------------------------|---------------|------------------------------|------------------|------------------------|------|--------|--------------------|---------------------------|
| USA        | African American  | PKLR | Stop Gained             |             | C>T                 | 1   | 155271142  | Het      | 36         | 520.77  | 44.4                   | 84            | 45                           | 15               | W>*                    | 1/11 |        |                    |                           |
| SA         | African           | PKLR | Missense Variant        |             | C>T                 | 1   | 155271098  | Het      | 237        | 933.85  | 25.3                   | 128           | 89                           | 30               | G>E                    | 1/11 |        | Deleterious (0.01) | Probably Damaging (0.995) |
| SA         | African           | PKLR | Missense Variant        |             | A>T                 | 1   | 155270005  | Het      | 46         | 178.21  | 21.7                   | 206           | 167                          | 56               | F>Y                    | 2/11 |        | Tolerated (0.29)   | Benign (0.075)            |
| USA        | African American  | PKLR | Missense Variant        |             | T>A                 | 1   | 155269960  | Het      | 79         | 555.01  | 25.3                   | 251           | 212                          | 71               | E>V                    | 2/11 |        | Deleterious (0)    | Probably Damaging (0.919) |
| USA        | African American  | PKLR | Missense Variant        |             | A>T                 | 1   | 155269934  | Het      | 40         | 1090.01 | 77.5                   | 277           | 238                          | 80               | S>T                    | 2/11 |        | Tolerated (0.19)   | Benign (0.087)            |
| UGA        | African           | PKLR | Missense Variant        |             | A>G                 | 1   | 155269924  | Het      | 46         | 100     | 54.35                  | 287           | 248                          | 83               | V>A                    | 2/11 |        | Tolerated (0.97)   | Benign (0.001)            |
| USA        | African American  | PKLR | Splice Donor Variant    |             | A>G                 | 1   | 155269887  | Het      | 61         | 730.01  | 37.7                   | 0             | 0                            | 0                |                        |      | 2/10   |                    |                           |
| USA        | African American  | PKLR | Missense Variant        |             | A>T                 | 1   | 155265533  | Het      | 150        | 544.01  | 24                     | 337           | 298                          | 100              | S>T                    | 3/11 |        | Tolerated (0.06)   | Benign (0.32)             |
| USA        | European American | PKLR | Missense Variant        |             | C>T                 | 1   | 155265484  | Het      | 49         | 245.01  | 30.6                   | 386           | 347                          | 116              | R>Q                    | 3/11 |        | Deleterious (0)    | Probably Damaging (0.996) |
| USA        | Hispanic          | PKLR | Missense Variant        |             | G>A                 | 1   | 155264966  | Het      | 73         | 648.55  | 30.1                   | 674           | 635                          | 212              | P>L                    | 5/11 |        | Deleterious (0.03) | Benign (0.094)            |
| USA        | African American  | PKLR | Missense Variant        |             | T>C                 | 1   | 155264910  | Het      | 31         | 180.37  | 32.3                   | 730           | 691                          | 251              | L>V                    | 5/11 |        | Tolerated (0.86)   | Benign (0.002)            |
| USA        | Multiracial       | PKLR | Splice Acceptor Variant |             | T>A                 | 1   | 155264545  | Het      | 48         | 353.18  | 27.1                   | 0             | 0                            | 0                |                        |      | 5/10   |                    |                           |
| USA        | African American  | PKLR | Missense Variant        |             | C>T                 | 1   | 155264463  | Het      | 51         | 418.89  | 47.1                   | 814           | 775                          | 259              | V>M                    | 6/11 |        | Deleterious (0.03) | Possibly Damaging (0.892) |
| SA         | African           | PKLR | Missense Variant        | rs147689373 | C>T                 | 1   | 155264409  | Het      | 49         | 772.63  | 47.9                   | 868           | 829                          | 277              | E>K                    | 6/11 |        | Tolerated (0.36)   | Possibly Damaging (0.742) |
| UGA        | African           | PKLR | Missense Variant        |             | T>C                 | 1   | 155264369  | Het      | 124        | 100     | 20.16                  | 908           | 869                          | 290              | K>R                    | 6/11 |        | Tolerated (0.24)   | Possibly Damaging (0.879) |
| USA        | European American | PKLR | Missense Variant        |             | G>T                 | 1   | 155264287  | Het      | 88         | 240.49  | 20.5                   | 990           | 951                          | 317              | H>Q                    | 6/11 |        | Tolerated (0.98)   | Possibly Damaging (0.577) |
| USA        | African American  | PKLR | Missense Variant        |             | C>T                 | 1   | 155264115  | Het      | 117        | 1141.01 | 31.6                   | 1066          | 1027                         | 343              | E>K                    | 7/11 |        | Deleterious (0)    | Probably Damaging (0.992) |
| USA        | European American | PKLR | Splice Region Variant   |             | G>A                 | 1   | 155263221  | Het      | 42         | 544.16  | 59.5                   | 0             | 0                            | 0                |                        |      | 8/10   |                    |                           |
| UGA        | African           | PKLR | Deletion                |             | AT>A                | 1   | 155263133  | Het      | 40         | 100     | 47.5                   | 1309          | 1270                         | 424              |                        |      | 9/11   |                    |                           |
| USA        | African American  | PKLR | Stop Gained             |             | G>A                 | 1   | 155263098  | Het      | 100        | 100     | 60                     | 1345          | 1306                         | 436              | Q>*                    | 9/11 |        |                    |                           |
| USA        | European American | PKLR | Missense Variant        |             | T>C                 | 1   | 155263097  | Het      | 61         | 190.09  | 23                     | 1346          | 1307                         | 436              | Q>R                    | 9/11 |        | Tolerated (0.27)   | Benign (0.423)            |
| SA         | African           | PKLR | Missense Variant        |             | C>T                 | 1   | 155263086  | Het      | 38         | 568.78  | 78.9                   | 1357          | 1318                         | 440              | E>K                    | 9/11 |        | Deleterious (0.05) | Possibly Damaging (0.858) |
| SA         | African           | PKLR | Stop Gained             |             | C>A                 | 1   | 155263086  | Het      | 63         | 228.29  | 24.2                   | 1357          | 1318                         | 440              | E>*                    | 9/11 |        |                    |                           |
